# Supplementary material
Source: PubMed Central journal article supplement (PMC10312276)
Supplement: PEDS_2022060352LSupplementaryData.pdf [file PEDS_2022060352LSupplementaryData.pdf]

## Supplemental Information

| Study Characteristic            | Statewide Analysis ( <i>N</i> = 115 Districts) | District-Wide Analysis ( <i>n</i> = 3 Districts)                |
|---------------------------------|------------------------------------------------|-----------------------------------------------------------------|
| Organization administering test | State                                          | District                                                        |
| Data availability               | Publically available                           | Provided to ABC Science Collaborative                           |
| Districts included              | All 115 public school districts in NC          | 3 public school districts included in ABC Science collaborative |
| Grades included                 | Grades 3–8                                     | Kindergarten–grade 8                                            |
| Subjects analyzed               | Mathematics                                    | Mathematics                                                     |
|                                 | Reading                                        | Reading                                                         |
| Timing of test administered     | End-of-grade                                   | Beginning of grade                                              |
|                                 |                                                | Middle of grade                                                 |
| Years analyzed                  | 2018–2019                                      | 2018–2019                                                       |
|                                 | 2020–2021                                      | 2019–2020                                                       |
|                                 |                                                | 2020–2021                                                       |
| Type of analysis conducted      | Multivariate analysis                          | Univariate analysis                                             |

| District-Level Characteristic | Districts, <i>N</i> | Proportion of Total ( <i>N</i> = 115) | Mathematics       |                        | Reading           |                        |
|-------------------------------|---------------------|---------------------------------------|-------------------|------------------------|-------------------|------------------------|
|                               |                     |                                       | Schools, <i>N</i> | Students Proficient, % | Schools, <i>N</i> | Students Proficient, % |
| Proportion of time in person  |                     |                                       |                   |                        |                   |                        |
| <1/3 of the year              | 16                  | 13.9                                  | 270               | 28.21                  | 277               | 35.90                  |
| 1/3 to 2/3 of the year        | 22                  | 19.1                                  | 555               | 37.22                  | 558               | 41.99                  |
| >2/3 of the year              | 77                  | 67.0                                  | 1013              | 42.34                  | 1020              | 43.67                  |
| Rural or urban classification |                     |                                       |                   |                        |                   |                        |
| Rural                         | 60                  | 52.2%                                 | 515               | 34.59                  | 523               | 38.62                  |
| Urban                         | 55                  | 47.8%                                 | 1323              | 40.16                  | 1332              | 43.26                  |
| ADI rank score                |                     |                                       |                   |                        |                   |                        |
|                               |                     | Median (Q1, Q3)                       |                   |                        |                   |                        |
| Higher ADI                    | 99                  | 71.36 (65.53–78.54)                   | 1301              | 36.61                  | 1316              | 39.37                  |
| Lower ADI                     | 16                  | 45.18 (39.28–45.91)                   | 537               | 43.47                  | 539               | 48.26                  |

Values reported as *N*, Median (Q1, Q3). *N*, number of districts; *Q*, quarter.

**SUPPLEMENTAL TABLE 7** Multivariable Sensitivity Analysis of District-level End-of-Grade (2020–2021) Student Proficiency by a 10% Increase in District Time In-Person (Hybrid Categorized as Not Fully in-Person)

|                                                                     | Change in % Students Proficient in Mathematics <sup>a</sup> | Change in % Students Proficient in Reading <sup>a</sup> |
|---------------------------------------------------------------------|-------------------------------------------------------------|---------------------------------------------------------|
| Primary analysis                                                    |                                                             |                                                         |
| All students, grades 3–8                                            | 1.20 (1.10–1.29)                                            | 0.41 (0.35–0.48)                                        |
| Secondary analysis                                                  |                                                             |                                                         |
| All students, grades 3–5 (elementary levels)                        | 1.40 (1.11–1.70)                                            | 0.46 (0.24–0.69)                                        |
| All students, grades 6–8 (middle school levels)                     | 0.84 (0.56–1.12)                                            | 0.29 (0.10–0.49)                                        |
| Sensitivity analysis (in-person time, excluding hybrid instruction) |                                                             |                                                         |
| All students                                                        | 3.89 (3.40–4.37)                                            | 1.15 (0.81–1.49)                                        |
| Secondary sensitivity analysis                                      |                                                             |                                                         |
| All students, grades 3–5 (elementary levels)                        | 2.60 (2.26–2.94)                                            | 0.82 (0.55–1.10)                                        |
| All students, grades 6–8 (middle school levels)                     | 1.65 (0.56–2.74)                                            | –0.16 (–0.93–0.60)                                      |

Model estimates reported as  $\beta$ -coefficient (95% CI); *P* value.  
<sup>a</sup>Multivariate linear regression of change in proportion of all students proficient modeled as a function of 0.1 increase in time the district spent in person, weighted by 2020–2021 district enrollment, adjusted for 2018–2019 proficiency, and controlled for district rural/urban status and area deprivation index rank score.

**SUPPLEMENTAL TABLE 8** Unweighted Multivariable Analysis of District-Level End-of-Grade (2020–2021) Student Proficiency by a 10% Increase in District Time In-Person<sup>a</sup>

| Student Demographic             | Change in % Students Proficient in Mathematics | Change in % Students Proficient in Reading |
|---------------------------------|------------------------------------------------|--------------------------------------------|
| All students                    | 1.12 (1.05–1.18)                               | 0.41 (0.36–0.46)                           |
| Economic status                 |                                                |                                            |
| Economically disadvantaged      | 1.31 (1.24–1.37)                               | 0.57 (0.52–0.63)                           |
| Not economically disadvantaged  | 1.20 (1.12–1.28)                               | 0.412 (0.35–0.48)                          |
| Race or ethnicity               |                                                |                                            |
| American Indian                 | 0.95 (0.66–1.23)                               | 1.27 (0.94–1.61)                           |
| Asian                           | 0.19 (–0.04 to 0.43)                           | 0.12 (–0.10 to 0.34)                       |
| Black                           | 0.88 (0.80–0.96)                               | 0.44 (0.36–0.51)                           |
| Hispanic                        | 1.43 (1.35–1.52)                               | 0.45 (0.37–0.53)                           |
| White                           | 1.01 (0.93–1.08)                               | 0.27 (0.20–0.34)                           |
| Two or more races               | 0.85 (0.72–0.99)                               | 0.58 (0.45–0.71)                           |
| Disability status               |                                                |                                            |
| Student with a disability       | 0.28 (0.22–0.35)                               | 0.02 (–0.05 to 0.08)                       |
| Not a student with a disability | 1.28 (1.20–1.35)                               | 0.50 (0.45–0.56)                           |
| English learner                 | 0.80 (0.69–0.91)                               | 0.09 (0.002–0.17)                          |
| Migrant                         | 0.71 (–0.16 to 1.59)                           | 0.55 (–0.27 to 1.38)                       |

<sup>a</sup>Model estimates reported as  $\beta$ -coefficient (95% CI). Multivariate linear regression of change in the percentage point of students proficient modeled for a 10% increase in time the district allowed in-person instruction, adjusting for 2018–2019 proficiency, and controlling for district rural or urban status and area deprivation index rank score.

| <b>SUPPLEMENTAL TABLE 9</b> Unweighted Multivariable Sensitivity Analysis of District-level End-of-Grade (2020–2021) Student Proficiency by a 10% Increase in District Time In-Person (Hybrid Categorized as Not Fully in-Person) <sup>a</sup> |                                                                   |                                                               |
|------------------------------------------------------------------------------------------------------------------------------------------------------------------------------------------------------------------------------------------------|-------------------------------------------------------------------|---------------------------------------------------------------|
|                                                                                                                                                                                                                                                | <b>Change in % Students Proficient in Mathematics<sup>b</sup></b> | <b>Change in % Students Proficient in Reading<sup>b</sup></b> |
| Primary analysis                                                                                                                                                                                                                               |                                                                   |                                                               |
| All students, grades 3–8                                                                                                                                                                                                                       | 1.13 (1.06–1.20)                                                  | 0.41 (0.36–0.46)                                              |
| Secondary analysis                                                                                                                                                                                                                             |                                                                   |                                                               |
| All students, grades 3–5 (elementary levels)                                                                                                                                                                                                   | 1.44 (1.22–1.65)                                                  | 0.54 (0.36–0.73)                                              |
| All students, grades 6–8 (middle school levels)                                                                                                                                                                                                | 0.68 (0.46–0.90)                                                  | 0.26 (0.09–0.43)                                              |
| Sensitivity analysis (in-person time, excluding hybrid instruction)                                                                                                                                                                            |                                                                   |                                                               |
| All students                                                                                                                                                                                                                                   | 2.19 (1.86–2.53)                                                  | 0.86 (0.61–1.10)                                              |
| Secondary sensitivity analysis                                                                                                                                                                                                                 |                                                                   |                                                               |
| All students, grades 3–5 (elementary levels)                                                                                                                                                                                                   | 1.84 (1.62–2.07)                                                  | 0.70 (0.50–0.90)                                              |
| All students, grades 6–8 (middle school levels)                                                                                                                                                                                                | 0.62 (0.07–1.17)                                                  | –0.07 (–0.48 to 0.35)                                         |

<sup>a</sup>Model estimates reported as  $\beta$ -coefficient (95% CI); *P* value.  
<sup>b</sup>Multivariate linear regression of change in proportion of all students proficient modeled as a function of 0.1 increase in time the district spent in person, adjusting for 2018–2019 proficiency, and controlling for district rural/urban status and area deprivation index rank score.

**SUPPLEMENTAL TABLE 10** Proportion of Students (Grades K-8) Achieving Grade-Level Beginning- and Middle- of Grade Proficiency, By District and Grade

|              | Mathematics                              |                              |                                                 |                                          |                              |                                                | Reading                                  |                              |                                                |                                          |                              |                                                |
|--------------|------------------------------------------|------------------------------|-------------------------------------------------|------------------------------------------|------------------------------|------------------------------------------------|------------------------------------------|------------------------------|------------------------------------------------|------------------------------------------|------------------------------|------------------------------------------------|
|              | BOY Proficiency Prepandemic <sup>a</sup> | BOY Proficiency in 2020–2021 | Difference in BOY Student Proficiency, (95% CI) | MOY Proficiency Prepandemic <sup>b</sup> | MOY Proficiency in 2020–2021 | Difference in MOY Student Proficiency (95% CI) | BOY Proficiency Prepandemic <sup>a</sup> | BOY Proficiency in 2020–2021 | Difference in BOY Student Proficiency (95% CI) | MOY Proficiency Prepandemic <sup>b</sup> | MOY Proficiency in 2020–2021 | Difference in MOY Student Proficiency (95% CI) |
| District 1   |                                          |                              |                                                 |                                          |                              |                                                |                                          |                              |                                                |                                          |                              |                                                |
| Kindergarten | N/A                                      | N = 684                      |                                                 | N/A                                      | N = 687                      |                                                | N = 16                                   | N/A                          |                                                | N = 15                                   | N/A                          |                                                |
| % Proficient |                                          | 55.7                         | N/A                                             |                                          | 60.8                         | N/A                                            | 0                                        |                              |                                                | N/A                                      |                              |                                                |
| Grade 1      | N = 2                                    | N = 744                      |                                                 | N = 4                                    | N = 695                      |                                                | N = 712                                  | N = 138                      |                                                | N = 734                                  | N = 329                      |                                                |
| % Proficient | 50.0                                     | 57.3                         | 7.3<br>(-6.2 to 7.6)                            | 25.0                                     | 61.2                         | 36.2<br>(-64.4 to 78.7)                        | 51.5                                     | 64.5                         | 13.0<br>(4.2–21.7)                             | 62.1                                     | 54.1                         | -8.0<br>(-14.4 to -1.6)                        |
| Grade 2      | N = 708                                  | N = 186                      |                                                 | N = 750                                  | N = 125                      |                                                | N = 717                                  | N = 729                      |                                                | N = 472                                  | N = 734                      |                                                |
| % Proficient | 68.2                                     | 15.1                         | -53.2<br>(-59.3 to -47.0)                       | 74.9                                     | 9.6                          | -65.3<br>(-71.4 to 59.3)                       | 71.1                                     | 36.5                         | -34.6<br>(-39.5 to -29.8)                      | 66.1                                     | 39.9                         | -26.2<br>(-31.7 to -20.6)                      |
| Grade 3      | N = 1382                                 | N = 44                       |                                                 | N = 1441                                 | N = 26                       |                                                | N = 388                                  | N = 751                      |                                                | N = 467                                  | N = 783                      |                                                |
| % Proficient | 69.2                                     | 15.9                         | -53.3<br>(-64.3 to -42.2)                       | 71.6                                     | 7.7                          | -63.92<br>(-74.4 to -53.4)                     | 54.1                                     | 35.3                         | -18.8<br>(-24.9 to -12.8)                      | 54.2                                     | 40.1                         | -14.0<br>(-19.6 to -8.3)                       |
| Grade 4      | N = 1388                                 | N/A                          |                                                 | N = 1398                                 | N/A                          |                                                | N = 708                                  | N = 727                      |                                                | N = 700                                  | N = 747                      |                                                |
| % Proficient | 71.3                                     | N/A                          | N/A                                             | 72.7                                     | N/A                          | N/A                                            | 46.9                                     | 36.2                         | -10.7<br>(-15.8 to -5.6)                       | 47.9                                     | 36.9                         | -10.9<br>(-16.0 to -5.8)                       |
| Grade 5      | N = 1414                                 | N/A                          |                                                 | N = 1413                                 | N/A                          |                                                | N = 687                                  | N = 731                      |                                                | N = 702                                  | N = 776                      |                                                |
| % Proficient | 73.3                                     | N/A                          | N/A                                             | 75.7                                     | N/A                          | N/A                                            | 48.1                                     | 30.3                         | -17.8<br>(-22.8 to -12.8)                      | 50.1                                     | 31.6                         | -18.6<br>(-23.5 to -13.6)                      |
| Grade 6      | N = 1486                                 | N/A                          |                                                 | N = 1489                                 | N/A                          |                                                | N = 731                                  | N = 769                      |                                                | N = 724                                  | N = 712                      |                                                |
| % Proficient | 77.9                                     | N/A                          | N/A                                             | 76.3                                     | N/A                          | N/A                                            | 43.4                                     | 26.5                         | -16.8<br>(-21.6 to -12.1)                      | 43.0                                     | 29.5                         | -13.5<br>(-18.4 to -8.5)                       |
| Grade 7      | N = 1624                                 | N/A                          |                                                 | N = 1628                                 | N/A                          |                                                | N = 809                                  | N = 799                      |                                                | N = 795                                  | N = 790                      |                                                |
| % Proficient | 72.2                                     | N/A                          | N/A                                             | 69.2                                     | N/A                          | N/A                                            | 36.1                                     | 25.9                         | -10.2<br>(-14.7 to -5.7)                       | 37.1                                     | 25.1                         | -12.0<br>(-16.6 to -7.5)                       |
| Grade 8      | N = 1787                                 | N/A                          |                                                 | N = 1762                                 | N/A                          |                                                | N = 875                                  | N = 841                      |                                                | N = 866                                  | N = 807                      |                                                |
| % Proficient | 62.9                                     | N/A                          | N/A                                             | 64.1                                     | N/A                          | N/A                                            | 31.2                                     | 20.1                         | 11.1<br>(-15.2 to -7.0)                        | 31.9                                     | 18.2                         | -13.7<br>(-17.7 to -9.6)                       |
| District 2   |                                          |                              |                                                 |                                          |                              |                                                |                                          |                              |                                                |                                          |                              |                                                |
| Kindergarten | N = 334                                  | N = 1183                     |                                                 | N = 333                                  | N = 1260                     |                                                | N = 188                                  | N = 1154                     |                                                | N = 187                                  | N = 1261                     |                                                |
| % Proficient | 23.4                                     | 26.6                         | 3.3<br>(-1.9 to 8.5)                            | 51.4                                     | 52.7                         | 1.4<br>(-4.7 to 7.4)                           | 41.0                                     | 36.8                         | -4.13<br>(-11.7 to 3.4)                        | 70.6                                     | 67.3                         | -3.3<br>(-10.3 to -3.8)                        |
| Grade 1      | N = 580                                  | N = 1279                     |                                                 | N = 578                                  | N = 1335                     |                                                | N = 301                                  | N = 1280                     |                                                | N = 295                                  | N = 1336                     |                                                |
| % Proficient | 14.1                                     | 16.5                         | 2.4<br>(-1.1 to 5.8)                            | 40.0                                     | 30.7                         | -9.3<br>(-14.0 to -4.6)                        | 29.2                                     | 21.2                         | -8.1<br>(-13.7 to -2.5)                        | 55.9                                     | 38.5                         | -17.5<br>(-23.7 to -11.2)                      |
| Grade 2      | N = 647                                  | N = 1224                     |                                                 | N = 641                                  | N = 1274                     |                                                | N = 344                                  | N = 1218                     |                                                | N = 341                                  | N = 1266                     |                                                |
| % Proficient | 20.7                                     | 16.7                         | -4.0<br>(-7.7 to -0.2)                          | 38.7                                     | 29.7                         | -8.9<br>(-13.5 to -4.4)                        | 47.7                                     | 28.7                         | -18.9<br>(-24.8 to -13.1)                      | 68.6                                     | 46.7                         | -21.9<br>(-27.6 to -16.3)                      |
| Grade 3      | N = 1805                                 | N = 1342                     |                                                 | N = 1782                                 | N = 1372                     |                                                | N = 353                                  | N = 1334                     |                                                | N = 335                                  | N = 1371                     |                                                |

**SUPPLEMENTAL TABLE 10** Continued

|              | Mathematics                              |                              |                                                 |                                          |                              |                                                | Reading                                  |                              |                                                |                                          |                              |                                                |
|--------------|------------------------------------------|------------------------------|-------------------------------------------------|------------------------------------------|------------------------------|------------------------------------------------|------------------------------------------|------------------------------|------------------------------------------------|------------------------------------------|------------------------------|------------------------------------------------|
|              | BOY Proficiency Prepandemic <sup>a</sup> | BOY Proficiency in 2020–2021 | Difference in BOY Student Proficiency, (95% CI) | MOY Proficiency Prepandemic <sup>b</sup> | MOY Proficiency in 2020–2021 | Difference in MOY Student Proficiency (95% CI) | BOY Proficiency Prepandemic <sup>a</sup> | BOY Proficiency in 2020–2021 | Difference in BOY Student Proficiency (95% CI) | MOY Proficiency Prepandemic <sup>b</sup> | MOY Proficiency in 2020–2021 | Difference in MOY Student Proficiency (95% CI) |
| % Proficient | 16.7                                     | 15.2                         | -1.5 (-4.1, 1.1)                                | 35.5                                     | 33.7                         | -1.9 (-5.2 to 1.5)                             | 61.8                                     | 45.4                         | -16.4 (-22.1 to -10.7)                         | 76.1                                     | 59.1                         | -17.0 (-22.3 to -11.8)                         |
| Grade 4      | N = 2739                                 | N = 1341                     |                                                 | N = 2725                                 | N = 1398                     |                                                | N = 2745                                 | N = 1351                     |                                                | N = 2732                                 | N = 1389                     |                                                |
| % Proficient | 31.7                                     | 21.2                         | -10.5 (-13.3 to -7.7)                           | 49.4                                     | 39.8                         | -9.6 (-12.7 to -6.4)                           | 33.7                                     | 31.8                         | -1.9 (-5.0 to 1.1)                             | 45.1                                     | 44.1                         | -1.0 (-4.2, 2.2)                               |
| Grade 5      | N = 2895                                 | N = 1364                     |                                                 | N = 2879                                 | N = 1403                     |                                                | N = 2908                                 | N = 1363                     |                                                | N = 2872                                 | N = 1402                     |                                                |
| % Proficient | 40.9                                     | 30.6                         | -10.2 (-13.3 to -7.2)                           | 57.7                                     | 46.6                         | -11.0 (-14.2 to -7.9)                          | 34.6                                     | 33.6                         | -1.0 (-4.0 to 2.1)                             | 44.0                                     | 42.2                         | -1.8 (-4.9 to 1.4)                             |
| Grade 6      | N = 2749                                 | N = 1268                     |                                                 | N = 2550                                 | N = 1306                     |                                                | N = 2738                                 | N = 1339                     |                                                | N = 2515                                 | N = 1381                     |                                                |
| % Proficient | 39.6                                     | 36.7                         | -2.9 (-6.2 to 0.3)                              | 52.1                                     | 42.0                         | -10.1 (-13.4 to -6.8)                          | 34.8                                     | 43.1                         | 8.3 (5.1–11.5)                                 | 42.9                                     | 44.1                         | 1.2 (-2.1 to 4.4)                              |
| Grade 7      | N = 2874                                 | N = 1303                     |                                                 | N = 2693                                 | N = 1319                     |                                                | N = 2792                                 | N = 1324                     |                                                | N = 2620                                 | N = 1369                     |                                                |
| % Proficient | 39.7                                     | 40.1                         | 0.4 (-2.8 to 3.6)                               | 47.4                                     | 43.7                         | -3.7 (-7.0 to -0.4)                            | 40.5                                     | 47.0                         | 6.5 (3.2–9.7)                                  | 48.2                                     | 47.3                         | -0.9 (-4.1 to 2.4)                             |
| Grade 8      | N = 2510                                 | N = 1206                     |                                                 | N = 2332                                 | N = 1239                     |                                                | N = 2645                                 | N = 1188                     |                                                | N = 2323                                 | N = 1258                     |                                                |
| % Proficient | 33.9                                     | 35.8                         | 1.9 (-1.4 to 5.2)                               | 41.5                                     | 40.3                         | -1.2 (-4.6 to 2.1)                             | 42.5                                     | 41.4                         | -1.1 (-4.5 to 2.3)                             | 48.6                                     | 45.6                         | -2.9 (-6.4 to 0.5)                             |
| District 3   |                                          |                              |                                                 |                                          |                              |                                                |                                          |                              |                                                |                                          |                              |                                                |
| Kindergarten | N = 725                                  | N = 326                      |                                                 | N = 772                                  | N = 322                      |                                                | N = 725                                  | N = 325                      |                                                | N = 724                                  | N = 309                      |                                                |
| % Proficient | 11.6                                     | 15.3                         | 3.8 (-0.8 to 8.3)                               | 46.4                                     | 47.8                         | 1.4 (-5.1 to 8.0)                              | 18.1                                     | 21.2                         | 3.2 (-2.1 to 8.4)                              | 63.7                                     | 35.6                         | -28.1 (-34.5 to -21.7)                         |
| Grade 1      | N = 734                                  | N = 361                      |                                                 | N = 723                                  | N = 358                      |                                                | N = 717                                  | N = 359                      |                                                | N = 717                                  | N = 341                      |                                                |
| % Proficient | 7.5                                      | 12.7                         | 5.3 (1.3 to 9.2)                                | 32.2                                     | 17.3                         | -14.9 (-20.1 to -9.7)                          | 12.3                                     | 20.3                         | 8.1 (3.3–12.9)                                 | 39.9                                     | 45.2                         | 5.3 (-1.1 to 11.7)                             |
| Grade 2      | N = 721                                  | N = 352                      |                                                 | N = 718                                  | N = 347                      |                                                | N = 717                                  | N = 348                      |                                                | N = 715                                  | N = 339                      |                                                |
| % Proficient | 10.1                                     | 11.1                         | 1.0 (-3.0 to 4.9)                               | 27.7                                     | 23.9                         | -3.8 (-9.4 to 1.8)                             | 19.8                                     | 26.4                         | 6.6 (1.2–12.1)                                 | 41.3                                     | 41.3                         | 0.0 (-6.3 to 6.4)                              |
| Grade 3      | N = 733                                  | N = 359                      |                                                 | N = 731                                  | N = 351                      |                                                | N = 733                                  | N = 351                      |                                                | N = 733                                  | N = 333                      |                                                |
| % Proficient | 8.7                                      | 10.9                         | 2.1 (-1.7 to 5.9)                               | 39.5                                     | 28.8                         | -10.8 (-16.7 to -4.8)                          | 38.2                                     | 38.7                         | 0.6 (-5.6 to 6.7)                              | 61.3                                     | 43.5                         | -17.7 (-24.1 to -11.3)                         |
| Grade 4      | N = 775                                  | N = 355                      |                                                 | N = 774                                  | N = 350                      |                                                | N = 778                                  | N = 350                      |                                                | N = 778                                  | N = 332                      |                                                |
| % Proficient | 28.6                                     | 16.1                         | -12.6 (-17.6 to -7.6)                           | 50.1                                     | 36.3                         | -13.8 (-20.0 to -7.7)                          | 27.8                                     | 27.1                         | -0.6 (-6.2 to 5.0)                             | 37.4                                     | 43.1                         | 5.7 (-0.7 to 12.0)                             |
| Grade 5      | N = 805                                  | N = 367                      |                                                 | N = 805                                  | N = 360                      |                                                | N = 803                                  | N = 360                      |                                                | N = 802                                  | N = 346                      |                                                |
| % Proficient | 38.3                                     | 23.4                         | -14.8 (-20.3 to -9.3)                           | 53.8                                     | 36.7                         | -17.1 (-23.2 to -11.1)                         | 26.9                                     | 32.2                         | 5.3 (-0.4 to 11.0)                             | 40.5                                     | 46.2                         | 5.7 (-0.5 to 12.0)                             |
| Grade 6      | N = 793                                  | N = 402                      |                                                 | N = 790                                  | N = 398                      |                                                | N = 792                                  | N = 399                      |                                                | N = 791                                  | N = 377                      |                                                |

SUPPLEMENTAL TABLE 10 Continued

|              | Mathematics                              |                              |                                                |                                          |                              |                                                | Reading                                  |                              |                                                |                                          |                              |                                                |
|--------------|------------------------------------------|------------------------------|------------------------------------------------|------------------------------------------|------------------------------|------------------------------------------------|------------------------------------------|------------------------------|------------------------------------------------|------------------------------------------|------------------------------|------------------------------------------------|
|              | BOY Proficiency Prepandemic <sup>a</sup> | BOY Proficiency in 2020–2021 | Difference in BOY Student Proficiency (95% CI) | MOY Proficiency Prepandemic <sup>b</sup> | MOY Proficiency in 2020–2021 | Difference in MOY Student Proficiency (95% CI) | BOY Proficiency Prepandemic <sup>a</sup> | BOY Proficiency in 2020–2021 | Difference in BOY Student Proficiency (95% CI) | MOY Proficiency Prepandemic <sup>b</sup> | MOY Proficiency in 2020–2021 | Difference in MOY Student Proficiency (95% CI) |
| % Proficient | 29.1                                     | 30.1                         | -9.0<br>(-14.6 to -3.4)                        | 50.9                                     | 38.4                         | -12.4<br>(-18.4 to -6.5)                       | 32.6                                     | 29.8                         | -2.8<br>(-8.3 to 2.8)                          | 40.7                                     | 42.4                         | 1.7<br>(-4.3 to 7.8)                           |
| Grade 7      | <i>N</i> = 798                           | <i>N</i> = 369               |                                                | <i>N</i> = 794                           | <i>N</i> = 350               |                                                | <i>N</i> = 800                           | <i>N</i> = 372               |                                                | <i>N</i> = 797                           | <i>N</i> = 367               |                                                |
| % Proficient | 34.7                                     | 31.4                         | -3.3<br>(-9.1 to 2.5)                          | 44.5                                     | 40.9                         | -3.6<br>(-9.8 to 2.6)                          | 38.0                                     | 38.4                         | 0.4<br>(-5.5 to 6.4)                           | 39.6                                     | 45.8                         | 6.1<br>(0–12.3)                                |
| Grade 8      | <i>N</i> = 787                           | <i>N</i> = 394               |                                                | <i>N</i> = 784                           | <i>N</i> = 358               |                                                | <i>N</i> = 787                           | <i>N</i> = 389               |                                                | <i>N</i> = 786                           | <i>N</i> = 379               |                                                |
| % Proficient | 31.5                                     | 27.7                         | -3.9<br>(-9.3 to 1.6)                          | 42.7                                     | 32.1                         | -10.6<br>(-16.6 to -4.7)                       | 37.0                                     | 39.3                         | 2.4<br>(-3.6 to 8.3)                           | 41.6                                     | 36.9                         | -4.7<br>(-10.6 to 1.3)                         |

<sup>a</sup>BOY "Pre-pandemic" included the average of 2018–2019 and 2019–2020 beginning of the year student proficiency.

<sup>b</sup>MOY "Prepandemic" included the average of 2018–2019 and 2019–2020 middle of the year student proficiency.
